# Supplementary material for: CdS/CdSe co-sensitized hierarchical TiO2 nanofiber/ZnO nanosheet heterojunction photoanode for quantum dot-sensitized solar cells
Source: Royal Society of Chemistry journal article supplement (doi:10.1039/c6ra15481f), 2016-01-01
Supplement: c6ra15481f1.pdf [file c6ra15481f1.pdf]

1

## Supplementary data

2 **CdS/CdSe co-sensitized hierarchical TiO<sub>2</sub> nanofiber/ZnO nanosheet**  
3 **heterojunction photoanode for quantum dot-sensitized solar cells**

4 Yang Cao, Yu-Jie Dong, Hong-Yan Chen\*, Dai-Bin Kuang\*, and Cheng-Yong Su

5

6

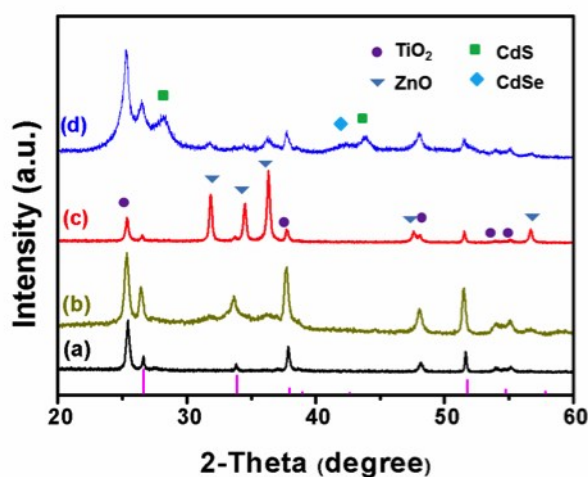

7

8 **Fig. S1** XRD patterns of bare TiO<sub>2</sub> fibers film (a), hierarchical TiO<sub>2</sub>-ZnO NSs film (b),  
9 hierarchical TiO<sub>2</sub>-ZnO NSs-500 film (c) and CdS/CdSe co-sensitized hierarchical TiO<sub>2</sub>-  
10 ZnO NSs-500 film (d), the standard magenta line respects peaks of FTO substrate  
11 (JCPDS card no. 41-1445).

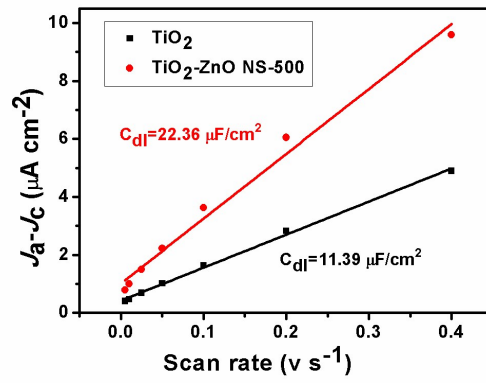

1

2 **Fig. S2** Plots showing the extraction of the double-layer capacitances ( $C_{dl}$ ) for the  
 3 estimation of relative electrochemically active surface area of different photoanode  
 4 films.

5

6

7

8

9

10

11

12

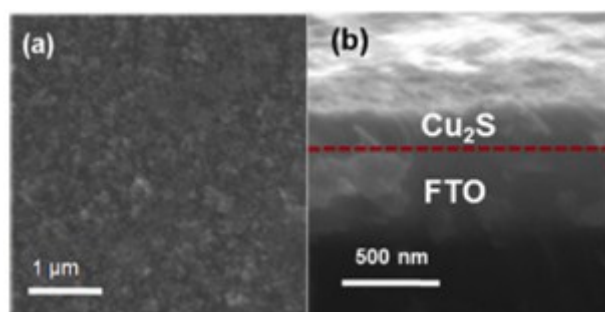

1

2 **Fig. S3** SEM images of the top (a) and (b) cross-section view of the as-synthesis

3 Cu<sub>2</sub>S/FTO electrode.
